# Supplementary material for: Nanoscale architecture of bimetallic hybrid Fe–Au nanostructures with and without 1,4-phenylene diisocyanide pre-functionalization
Source: Royal Society of Chemistry journal article supplement (doi:10.1039/c5ra02564h), 2015-01-01
Supplement: c5ra02564h1.pdf [file c5ra02564h1.pdf]

## Supporting Information

### Nanoscale Architecture of Bimetallic Hybrid Fe-Au Nanostructures with and without 1,4-Phenylene Diisocyanide Pre-Functionalization

**Youngku Sohn,<sup>a,b</sup> Debabrata Pradhan,<sup>a,c</sup> Jung-Soo Kang,<sup>a</sup> and K. T. Leung<sup>a,\*</sup>**

<sup>a</sup>*WATLab, and Department of Chemistry*

*University of Waterloo, Waterloo, Ontario N2L 3G1, Canada*

<sup>b</sup>*Department of Chemistry, Yeungnam University, Gyeongsan, Gyeongbuk 712-749, South Korea.*

<sup>c</sup>*Materials Science Center, Indian Institute of Technology, Kharagpur, West Bengal 721 302, India.*

\* Corresponding author e-mail: [tong@uwaterloo.ca](mailto:tong@uwaterloo.ca)

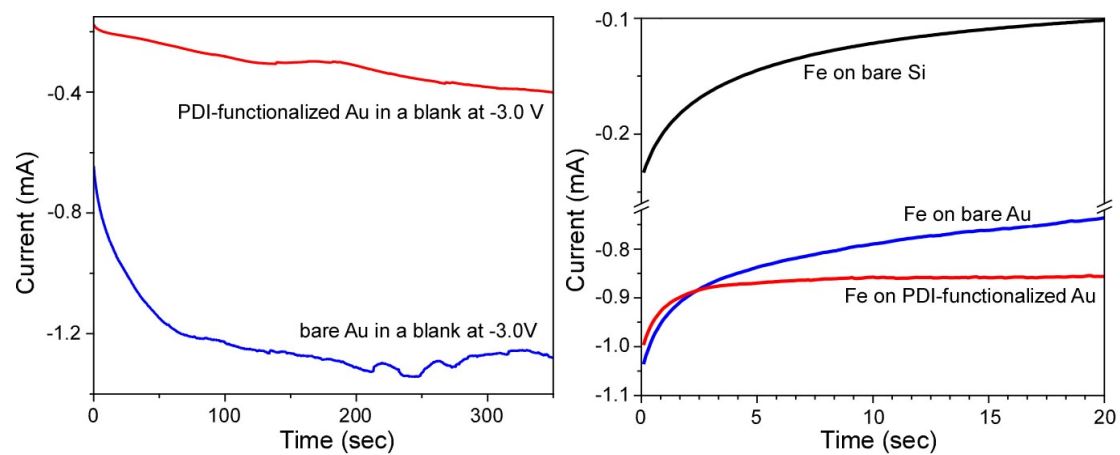

**Figure S1:** I-t curves of bare and PDI-functionalized Au NITs in a blank deionized water at a potential of  $-3.0$  V (Figure 1, Samples A1 and A2, respectively), and Fe electrodeposition on bare Si, bare Au NIT, and PDI-functionalized Au NIT.

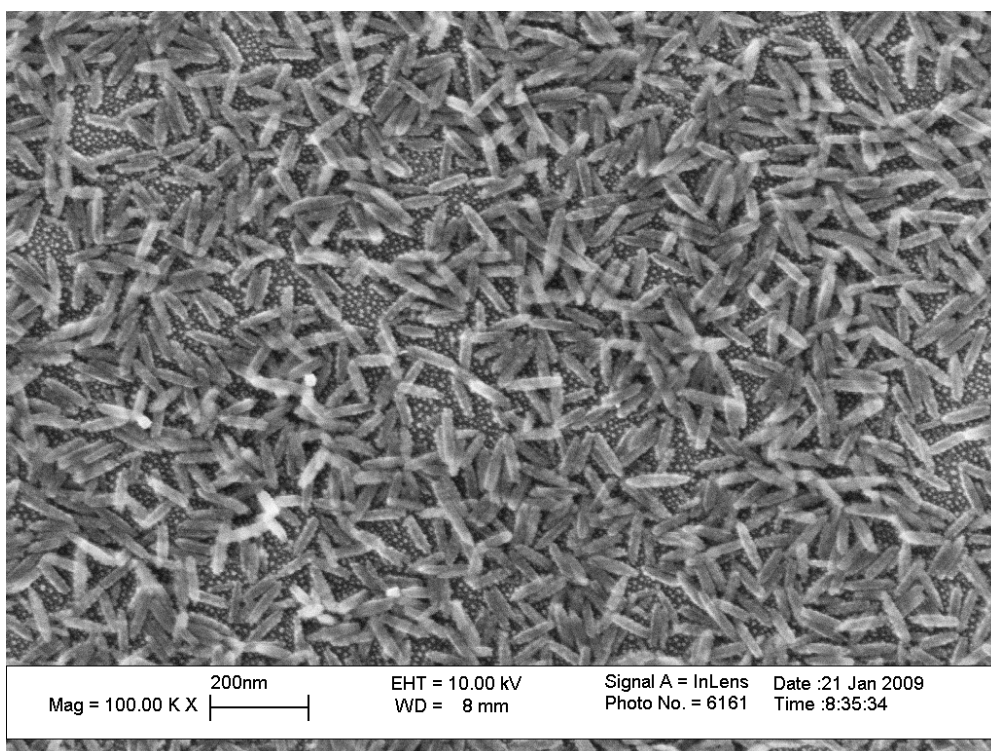

**Figure S2a:** SEM image of Fe NPs electrodeposited on PDI-functionalized Au NIs.

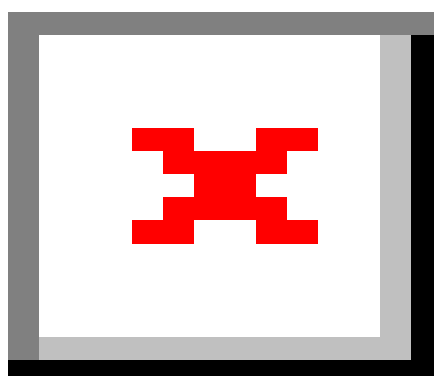

**Figure S2b:** Back-scattered electron image of Fe NPs electrodeposited on bare Au NIs.

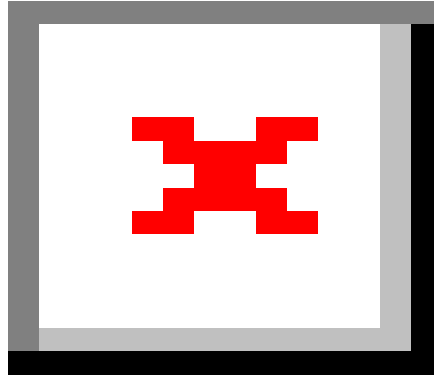

**Figure S3a:** SEM image of Fe NPs electrodeposited on a bare Si substrate.

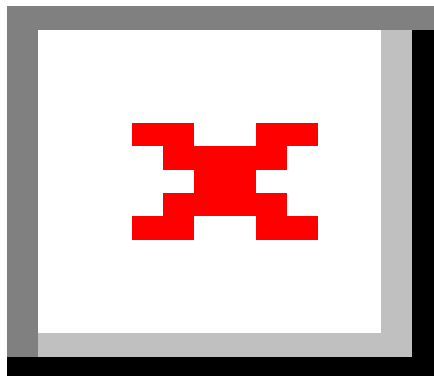

**Figure S3b:** SEM image of Fe NPs electrodeposited on a bare Au NI template.

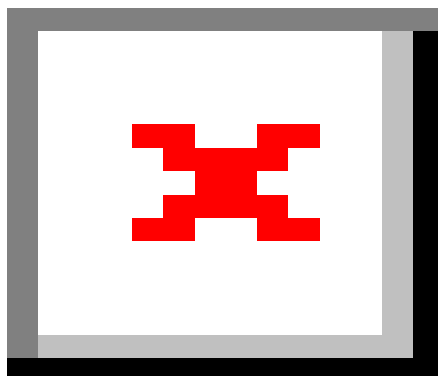

**Figure S3c:** SEM image of Fe NIP electrodeposited on PDI-functionalized Au NIs.

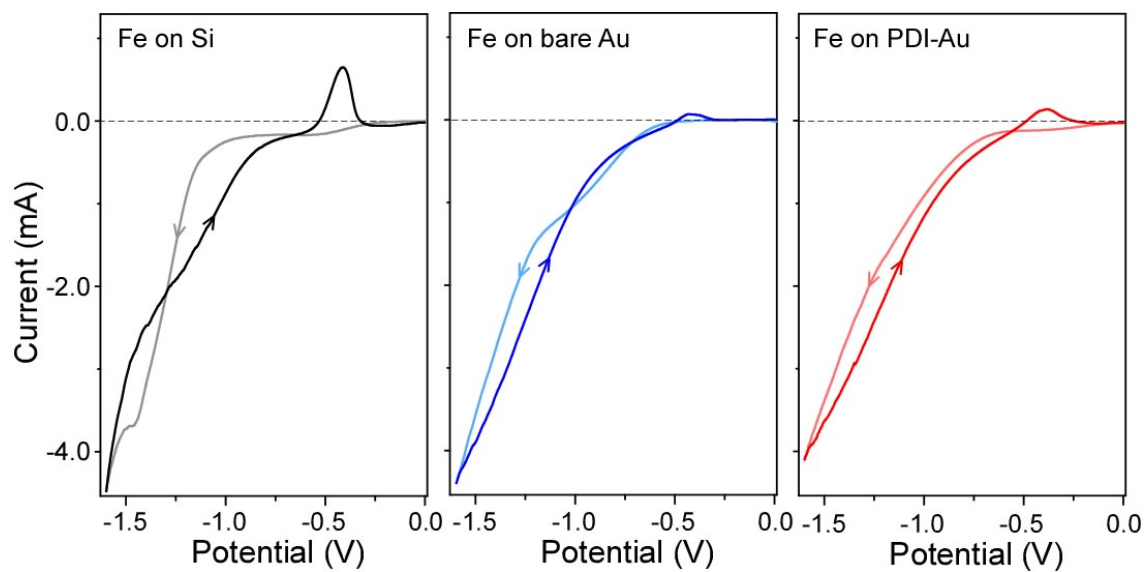

**Figure S3d:** Cyclic voltammograms for samples shown in Figure S3a, S3b, and S3c.

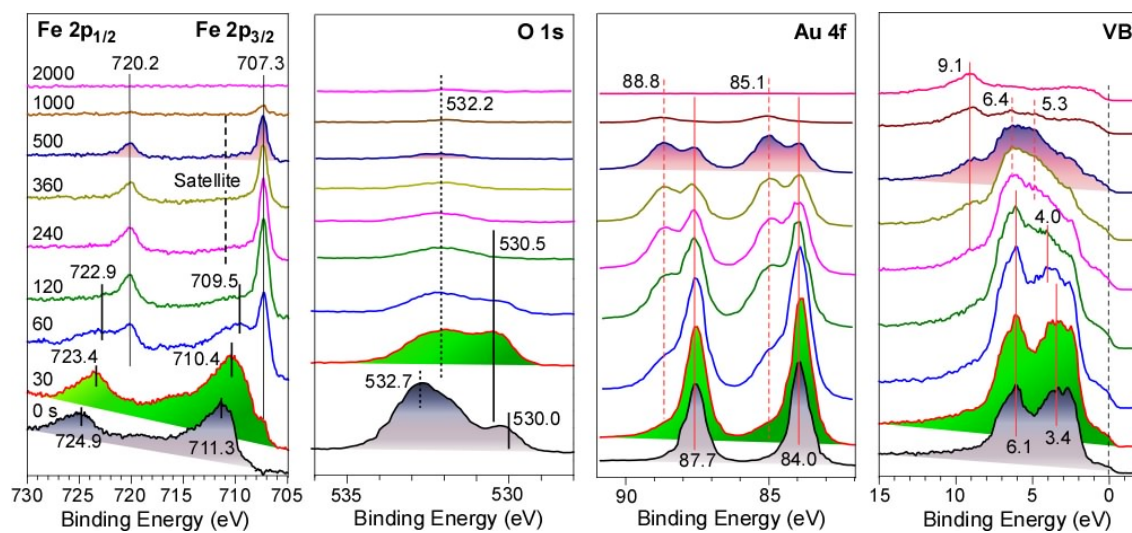

**Figure S4:** XPS spectra of Fe 2p, O 1s, Au 4f and valence band (VB) regions of Fe electrodeposited on large Au NIs, shown in [Figure 2](#), [Sample F1](#).

**Table S1:** Review of Au 4f XPS of Fe-Au hybrid materials.

| Preparation method                                                                         | System                                                                                     | Au Species<br>(4f <sub>7/2</sub> Binding Energy, eV)                                                                                | Ref.      |
|--------------------------------------------------------------------------------------------|--------------------------------------------------------------------------------------------|-------------------------------------------------------------------------------------------------------------------------------------|-----------|
| Co-precipitation,<br>1wt% Au                                                               | Au/ FeO(OH),<br>Fe <sub>2</sub> O <sub>3</sub><br>Au/ Fe <sub>3</sub> O <sub>4</sub> , FeO | Au <sup>0</sup> (84.3)<br>Au <sup>0</sup> , electron-rich state (83.8)                                                              | 51        |
| Deposition-<br>precipitation on<br>Fe <sub>x</sub> O <sub>y</sub> , 3wt%                   | Au/ Fe <sub>x</sub> O <sub>y</sub><br>anneal(150-300°C)                                    | Au <sup>0</sup> (≤ 84.1)                                                                                                            | 52        |
| Impregnation of<br>Au(PPh <sub>3</sub> )(NO <sub>3</sub> ) on<br>Fe oxides                 | Au/Fe(OH) <sub>3</sub> , and<br>Au/ Fe <sub>2</sub> O <sub>3</sub>                         | Au <sup>I</sup> 84.9: strongly bound<br>[Au(PPh <sub>3</sub> )] <sup>+</sup><br>Au <sup>0</sup> 84.0: upon annealing                | 53        |
| Au reduction on<br>Fe <sub>3</sub> O <sub>4</sub><br>5nm core/1nm shell                    | Fe <sub>3</sub> O <sub>4</sub> @Au core-<br>shell                                          | Au <sup>0</sup> (84.2)                                                                                                              | 54        |
| Reduction of Au into<br>Porous alpha-Fe <sub>2</sub> O <sub>3</sub><br>Nanorods<br>0.5 wt% | Au into porous<br>alpha-Fe <sub>2</sub> O <sub>3</sub>                                     | Au <sup>0</sup> (83.2) negative state                                                                                               | 55        |
| Co-precipitation and<br>deposition-<br>precipitation                                       | Au/Fe <sub>2</sub> O <sub>3</sub>                                                          | Au <sup>0</sup> (84.0):70-85%<br>AuO <sub>x</sub> (84.8)30-15%                                                                      | 56        |
| Co-precipitation,<br>5wt% Au                                                               | Au/Fe <sub>2</sub> O <sub>3</sub>                                                          | As-prepared: mixed Au <sup>0</sup><br>(84.3) and AuO <sub>x</sub> (85.1)<br>Upon 673K calcination:<br>mainly Au <sup>0</sup> (84.3) | 57        |
| Sputter deposition of<br>Au on Fe <sub>x</sub> O <sub>y</sub>                              | Au/ Fe <sub>x</sub> O <sub>y</sub>                                                         | Au <sup>0</sup> (84.1)<br>Au-O (84.5) at the interface                                                                              | This work |
| Electrodeposition of<br>Au on Fe <sub>x</sub> O <sub>y</sub>                               | Au/ Fe <sub>x</sub> O <sub>y</sub>                                                         | Au <sup>0</sup> (84.1)<br>Au-O (84.5) at the interface                                                                              | This work |
| Electrodeposition of<br>Fe oxides on Au/Si                                                 | Fe <sub>x</sub> O <sub>y</sub> /Au                                                         | Au <sup>0</sup> (84.1)                                                                                                              | This work |
